# Supplementary material
Source: PubMed Central journal article supplement (PMC3734592)

# Supplemental figure 1

A

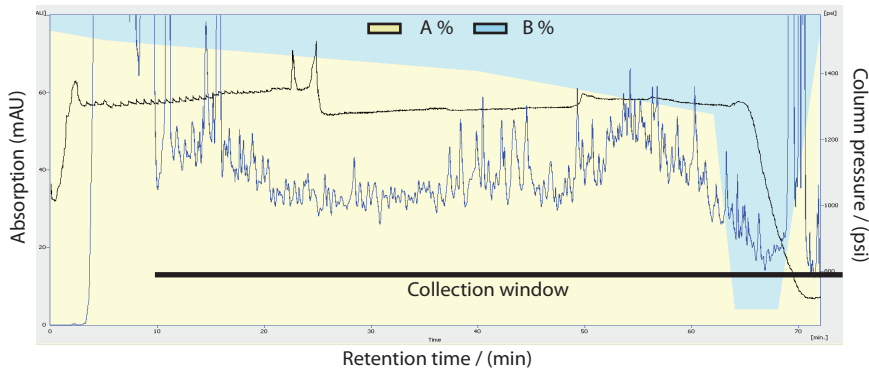

B

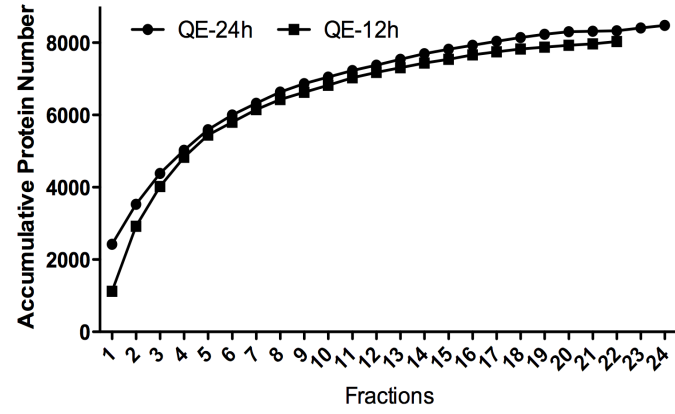

C

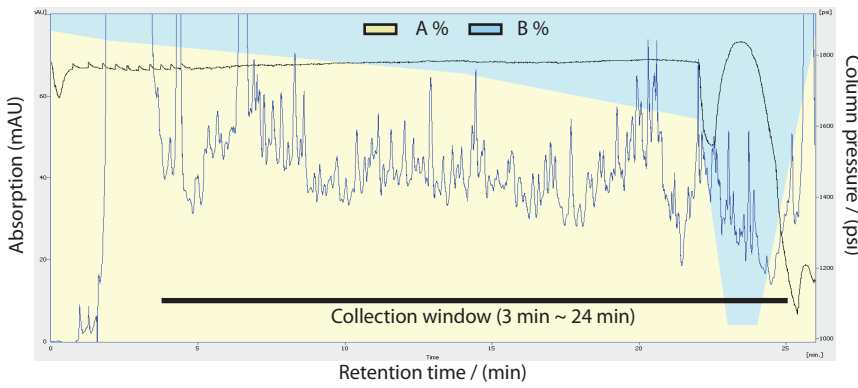

D

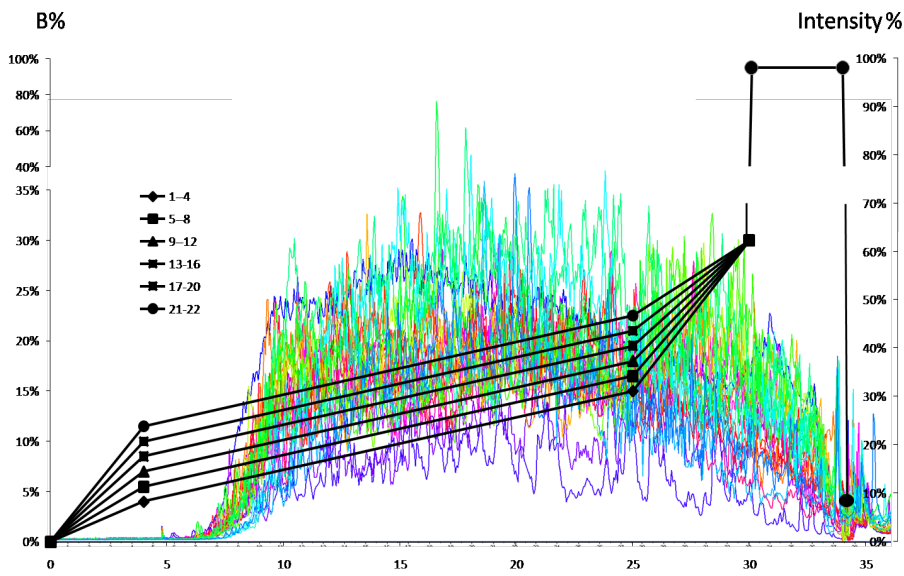

Supplement: supp_O112.025023_mcp.O112.025023-1.pdf [file supp_O112.025023_mcp.O112.025023-1.pdf]

# Supplemental figure 2

A

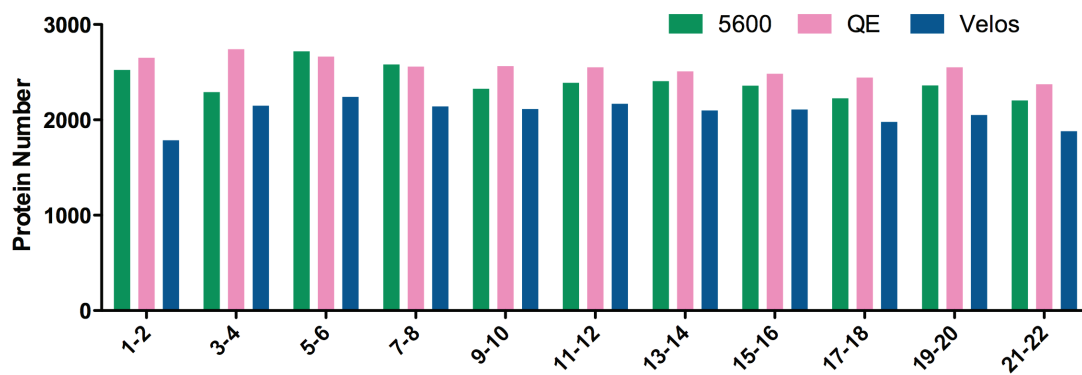

B

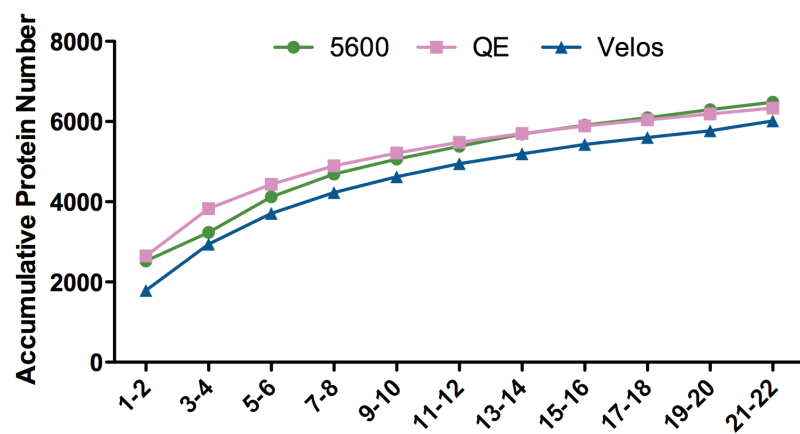

C

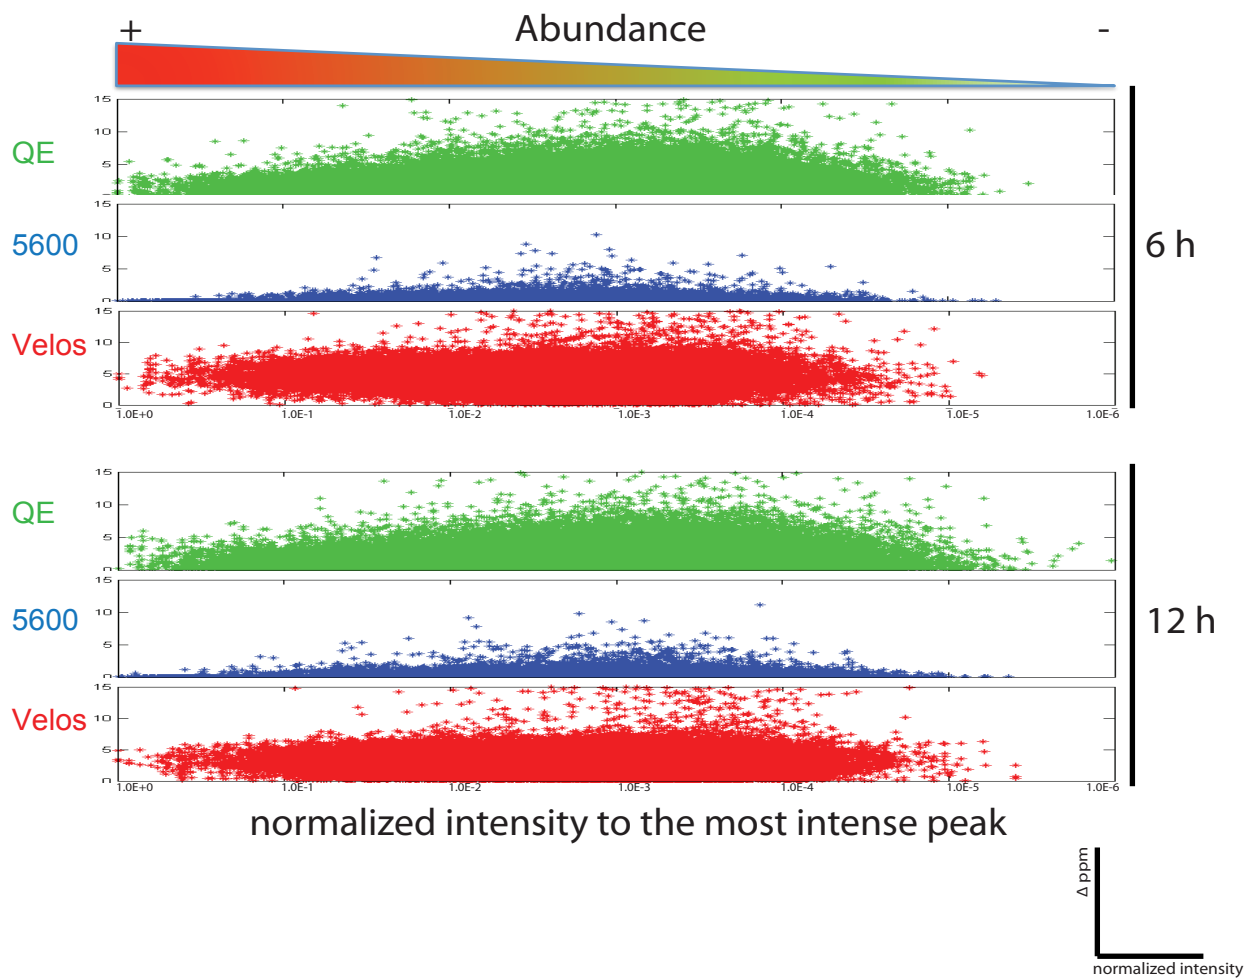

Supplement: supp_O112.025023_mcp.O112.025023-2.pdf [file supp_O112.025023_mcp.O112.025023-2.pdf]

# Supplemental figure 3

A

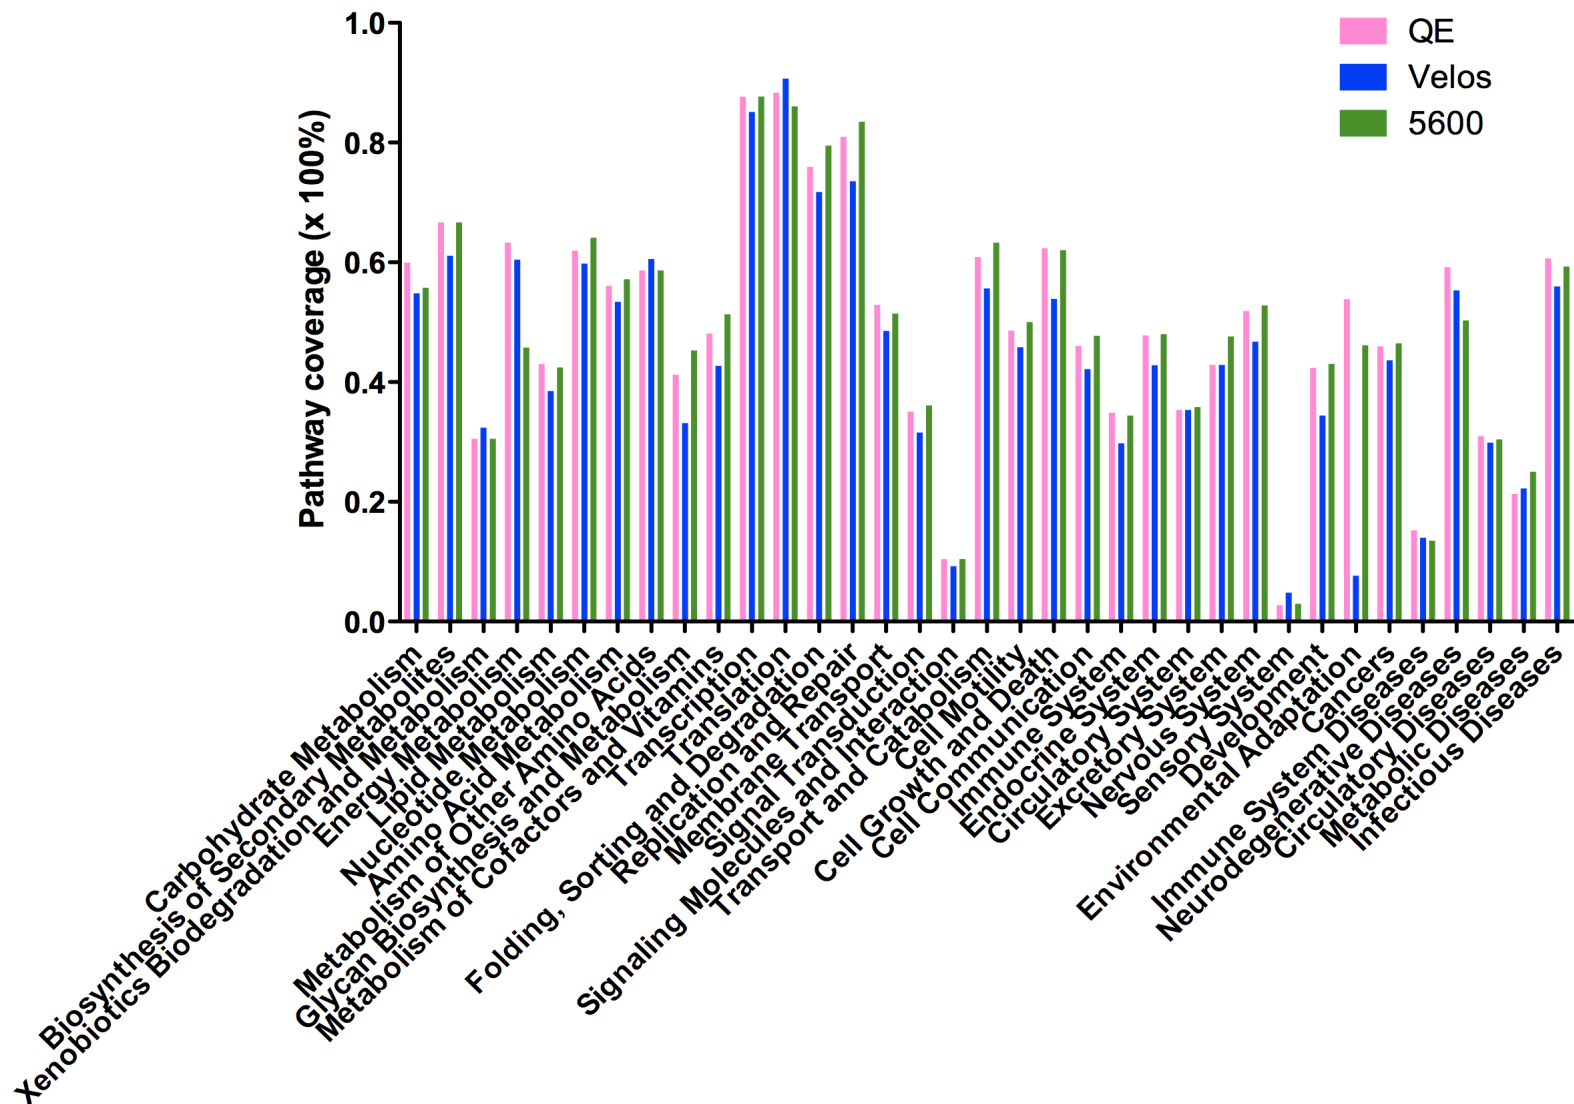

Supplement: supp_O112.025023_mcp.O112.025023-3.pdf [file supp_O112.025023_mcp.O112.025023-3.pdf]

# Supplemental figure 4

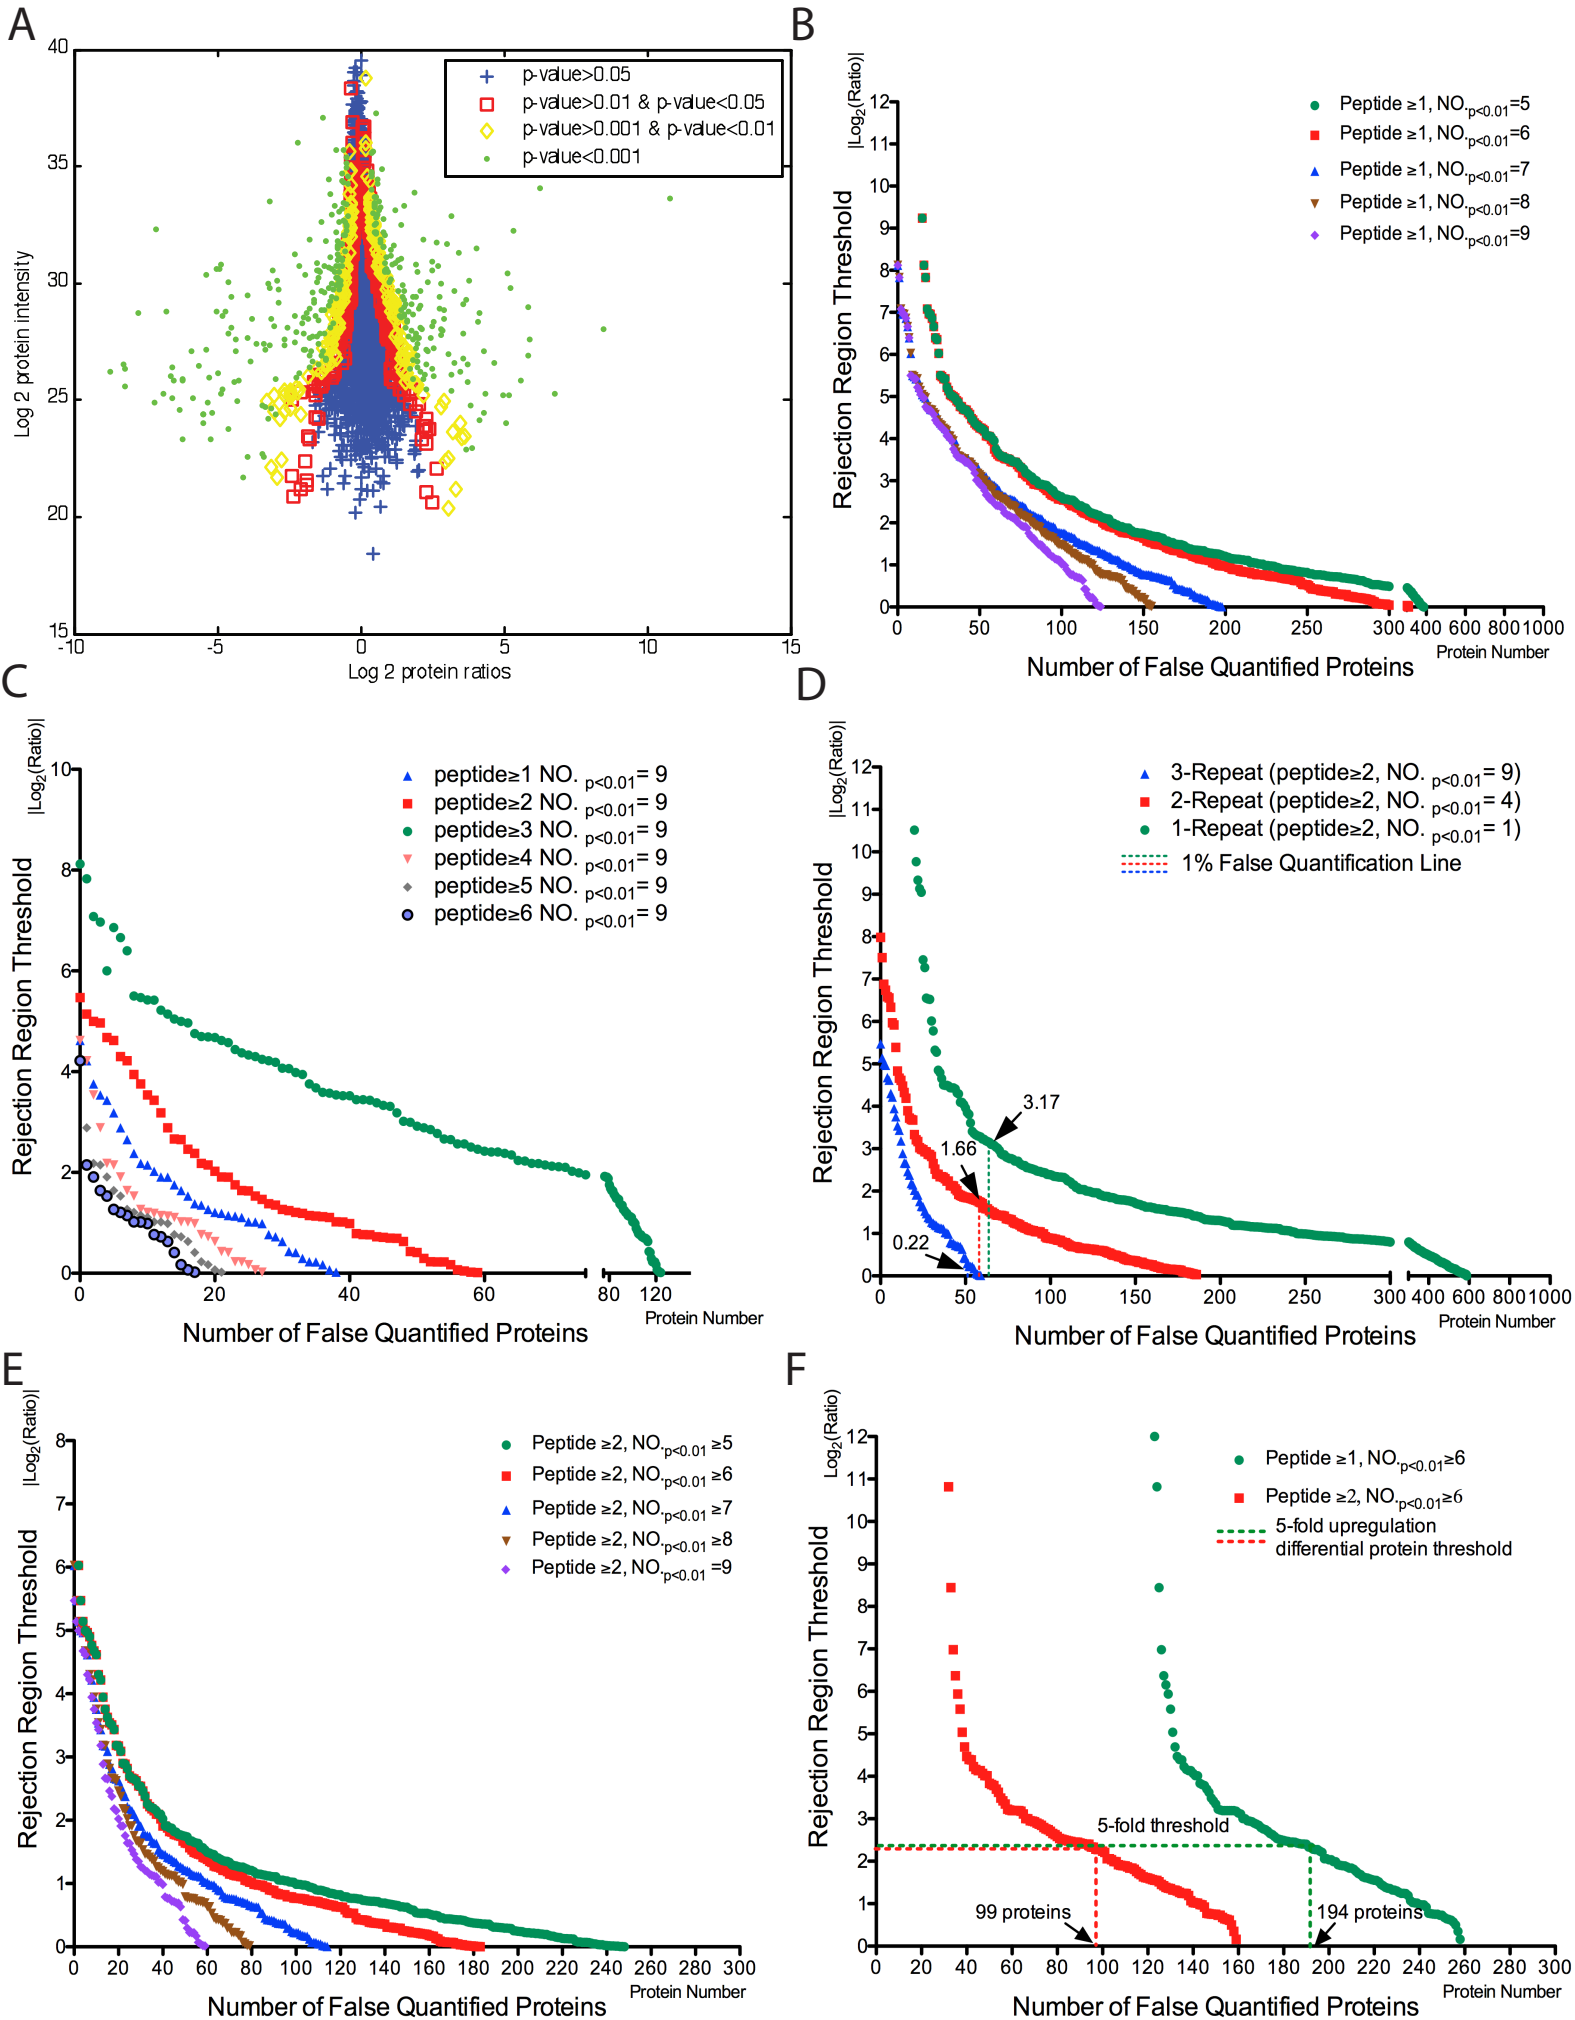

Supplement: supp_O112.025023_mcp.O112.025023-4.pdf [file supp_O112.025023_mcp.O112.025023-4.pdf]
